# Supplementary material for: Evaluation of the Biological Activity of Glucosinolates and Their Enzymolysis Products Obtained from Lepidium meyenii Walp. (Maca)
Source: MDPI journal article supplement (doi:10.3390/ijms232314756), 2022-11-25
Supplement: s1 [file s1]

**Evaluation of the Biological Activity of Glucosinolates and Their  
Enzymolysis Products Obtained from *Lepidium meyenii* Walp.  
(Maca)**

**Suitong Yan<sup>1</sup>, Jinchao Wei<sup>2</sup>, Rui Chen<sup>1,\*</sup>**

<sup>1</sup> College of Chemistry and Chemical Engineering, Yunnan Normal University,  
Kunming 650500, China

<sup>2</sup> Institute of Chemistry, The Chinese Academy of Sciences, Beijing 100190, China

Corresponding author: Rui Chen

College of Chemistry and Chemical Engineering, Yunnan Normal University,  
Kunming 650500, China

E-mail: 4364@ynnu.edu.cn

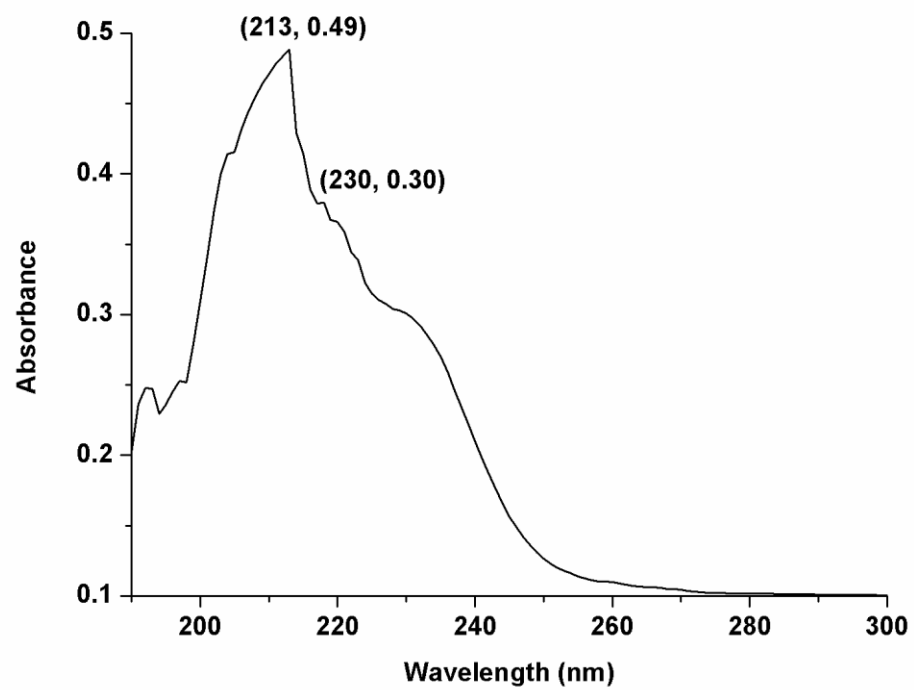

Figure S1 Ultraviolet absorption spectroscopy of glucosinolates.

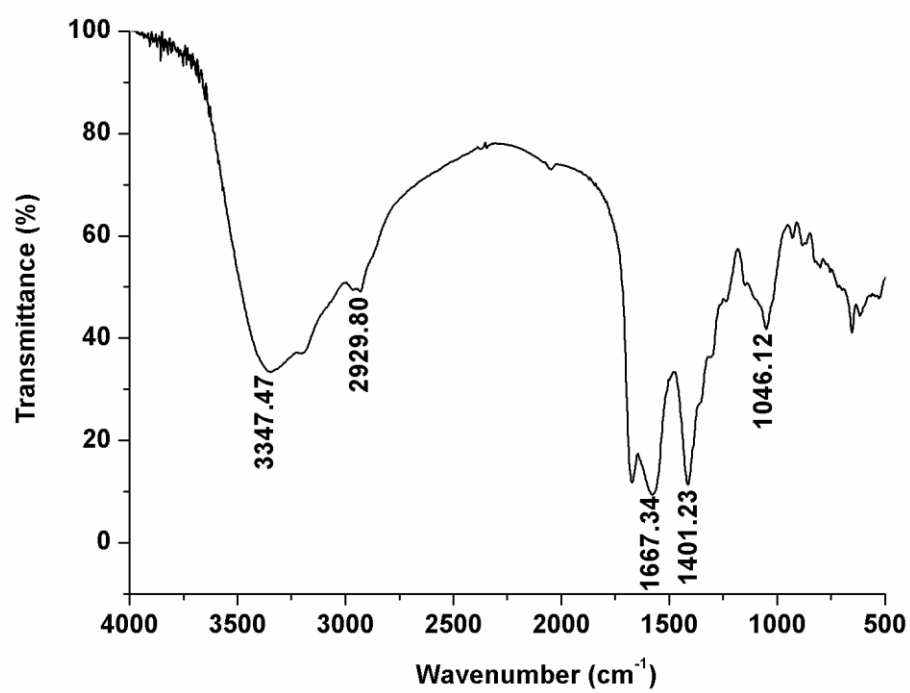

Figure S2 Fourier-transform infrared absorption spectroscopy of glucosinolates.

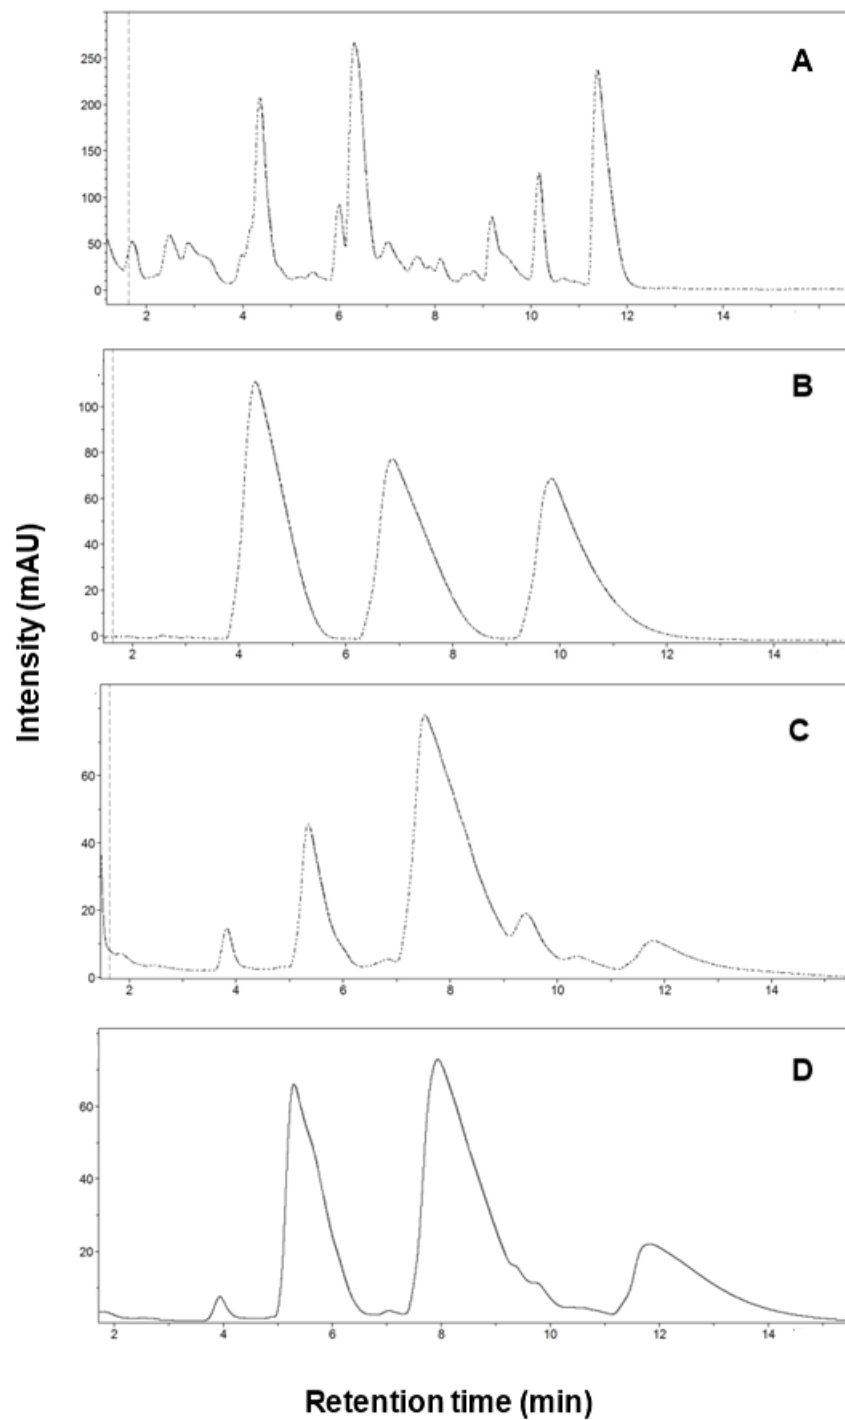

Figure S3 Ultra-high performance liquid chromatograms of Maca crude extract (A), standards (B), purified sample (C) and spiked sample (D), respectively.

Table S1 Characterization of *p*-hydroxybenzyl glucosinolate (GSB), benzyl glucosinolate (GTL) and *m*-methoxybenzyl glucosinolate (GLH) by ultra-high performance liquid chromatography-electrospray ionization-mass spectrometry

| Sample | Chemical formula                                                 | Chemical structure                                                                   | Ion type detected by MS | Measured m/z of ion | Theoretical m/z of ion | Relative error (ppm) |
|--------|------------------------------------------------------------------|--------------------------------------------------------------------------------------|-------------------------|---------------------|------------------------|----------------------|
| GSB    | C <sub>14</sub> H <sub>18</sub> KNO <sub>10</sub> S <sub>2</sub> | 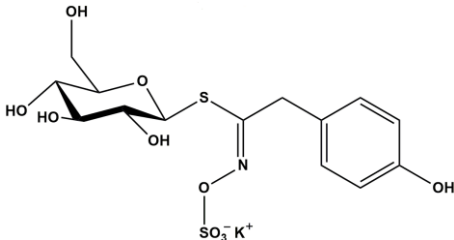   | [M-K] <sup>-</sup>      | 424.0389            | 424.0372               | 4.01                 |
| GTL    | C <sub>14</sub> H <sub>18</sub> KNO <sub>9</sub> S <sub>2</sub>  |   | [M-K] <sup>-</sup>      | 408.0443            | 408.0423               | 4.90                 |
| GLH    | C <sub>15</sub> H <sub>20</sub> KNO <sub>10</sub> S <sub>2</sub> |  | [M-K] <sup>-</sup>      | 438.0548            | 438.0529               | 4.34                 |

Table S2 The effects of glucosinolates extracted from dried Maca (D-GLS) and fresh Maca (F-GLS), benzyl glucosinolate (GTL), and benzyl isothiocyanate (BITC) at 100 µg/mL on growth inhibition of different tumor cell lines

| Sample | Cell inhibition rate (%) |            |            |            |            |
|--------|--------------------------|------------|------------|------------|------------|
|        | HL-60                    | A549       | SMMC-7721  | MCF-7      | SW480      |
| D-GLS  | 19.01±0.32               | 2.88±2.36  | 2.35±2.38  | 17.06±2.91 | 29.14±2.57 |
| F-GLS  | 27.58±1.14               | 4.08±0.76  | 7.09±1.39  | 11.73±1.58 | 13.83±3.10 |
| GTL    | 2.60±2.15                | 10.42±0.12 | 6.36±0.60  | 18.25±1.66 | 16.64±1.86 |
| BITC   | 99.32±0.19               | 99.67±0.07 | 99.85±0.09 | 97.98±0.64 | 98.01±0.11 |
